# Supplementary material
Source: publisher site journal article supplement (https://www.dovepress.com/article/351045)

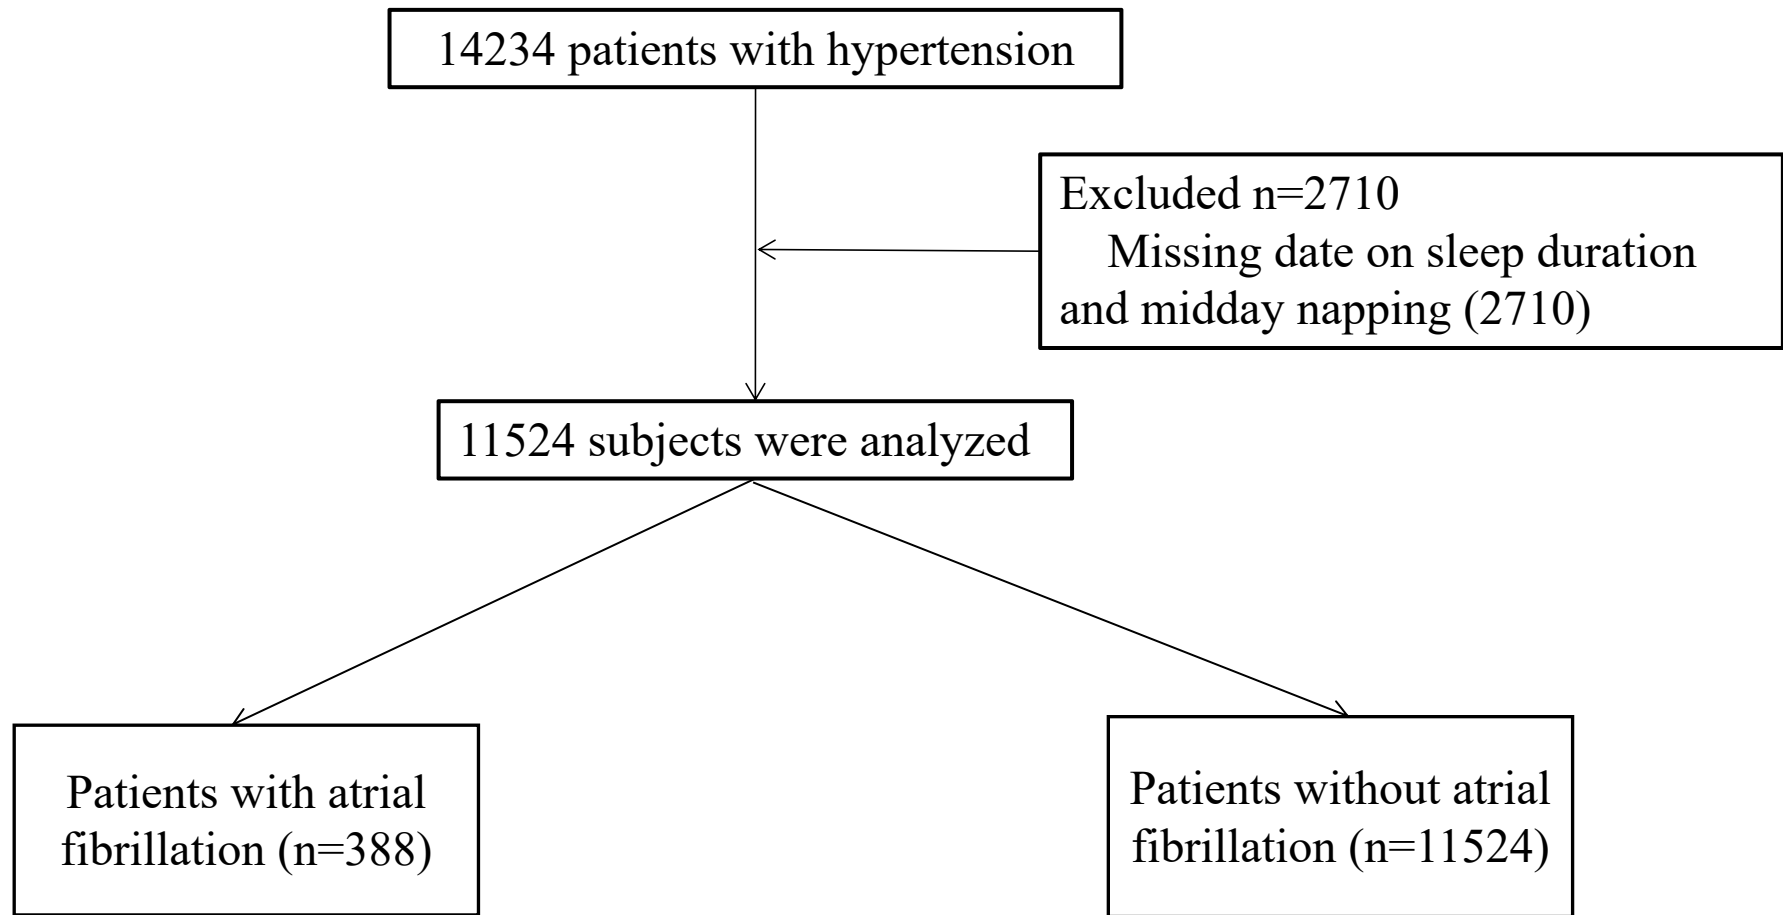

## **Figure legends**

### **Figure S1. Flow chart**

Supplement: Supplementary file 1 [file get_supplementary_file.php]
